# Supplementary figures and images for: Dynamic Distribution of the SecA and SecY Translocase Subunits and Septal Localization of the HtrA Surface Chaperone/Protease during Streptococcus pneumoniae D39 Cell Division
Source: PubMed Central journal article supplement — mBio. 2011 Oct 11;2(5):e00202-11. doi: 10.1128/mBio.00202-11 (PMC3188284; doi:10.1128/mbio.00202-11), 2011-10-11

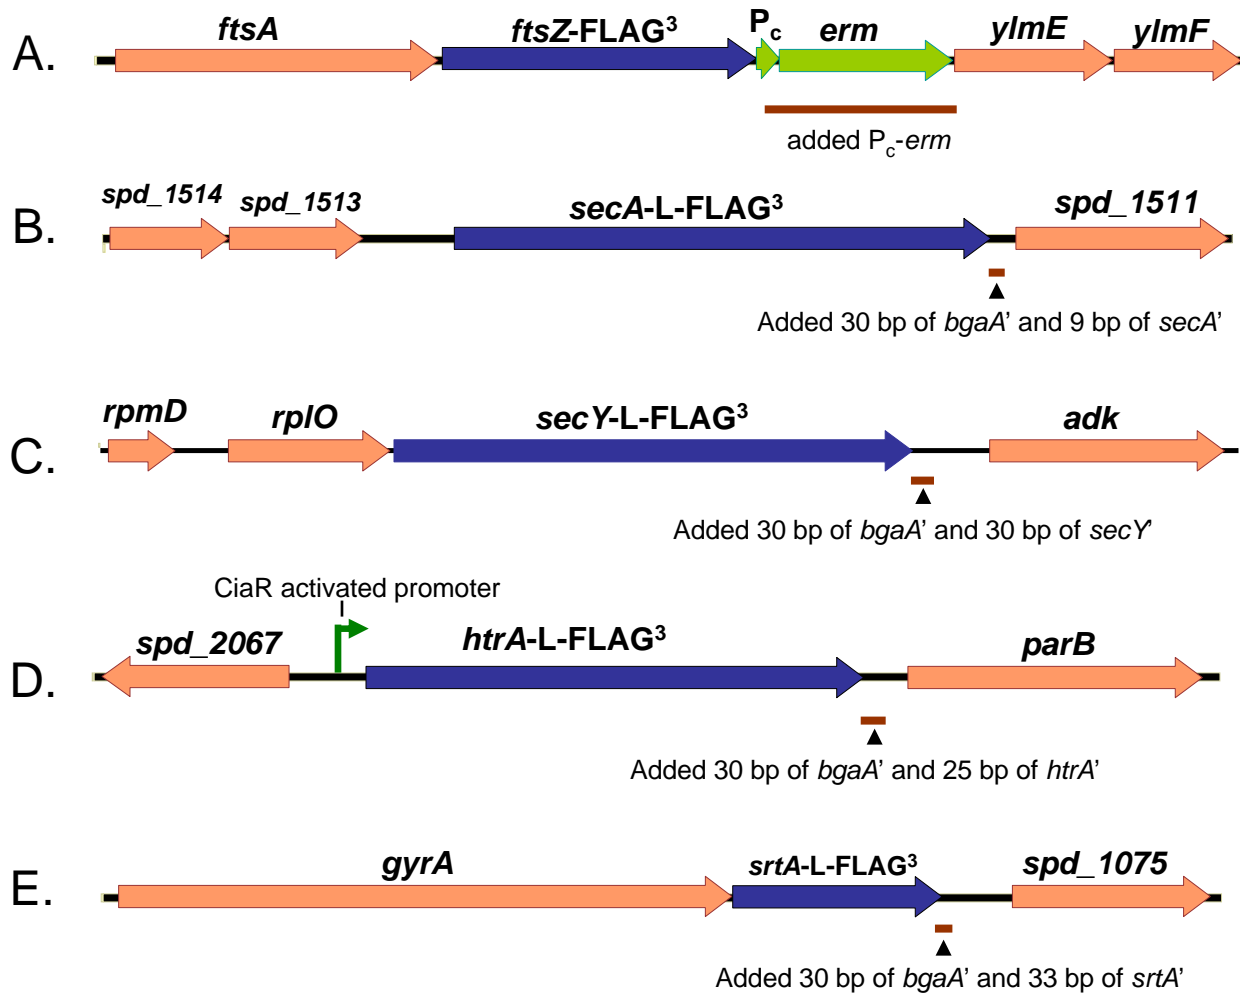

Supplement: mbo005111174sf01.pdf [file mbo005111174sf01.pdf]

# SecY-L-FLAG<sup>3</sup>

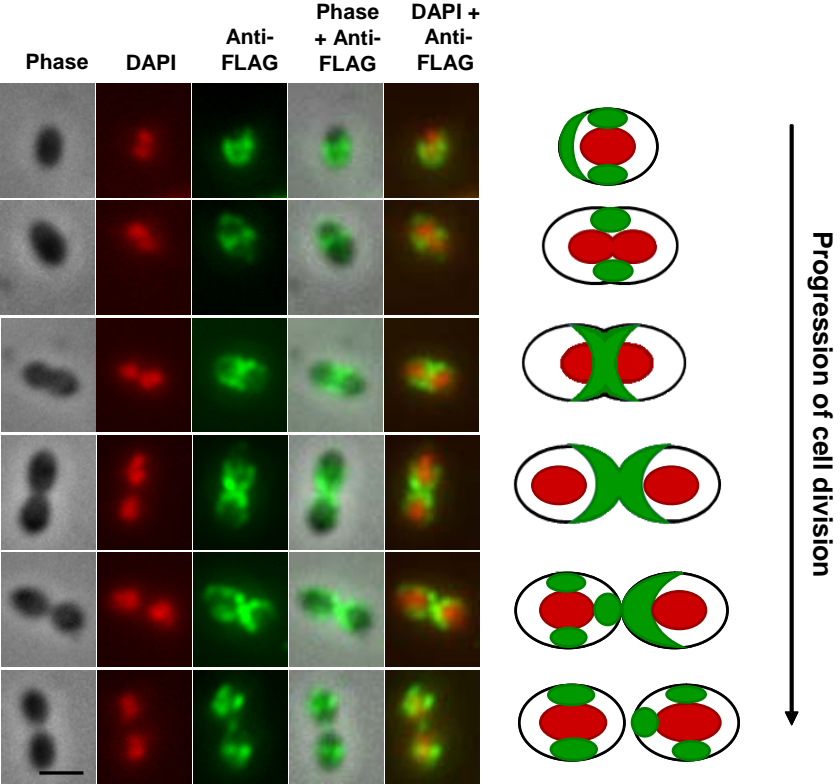

Supplement: mbo005111174sf02.pdf [file mbo005111174sf02.pdf]

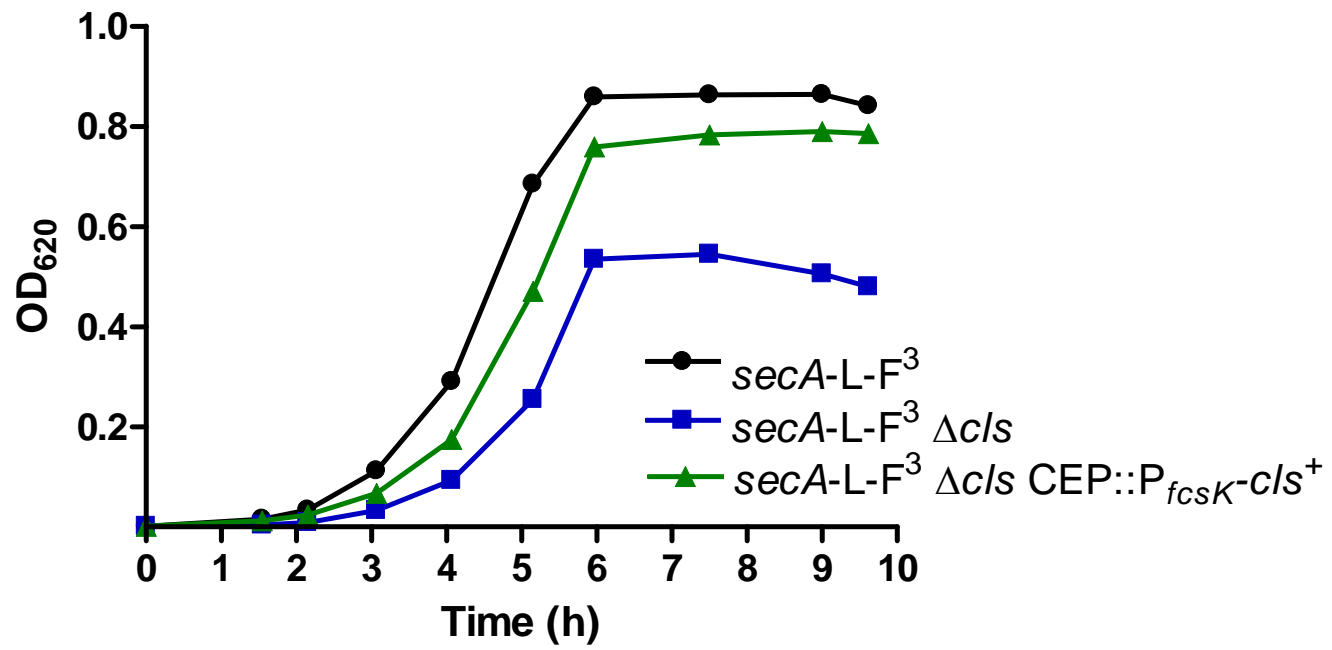

Supplement: mbo005111174sf03.pdf [file mbo005111174sf03.pdf]

A. *secA-L-FLAG<sup>3</sup>*

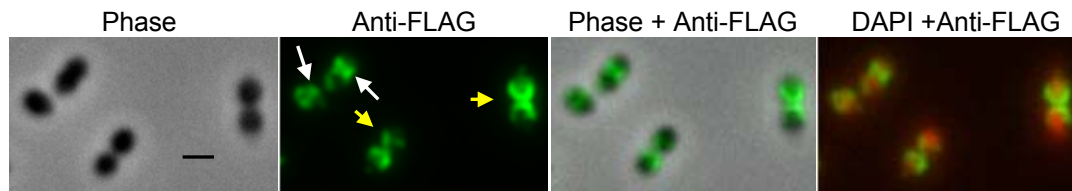

B. *secA-L-FLAG<sup>3</sup> Δcls*

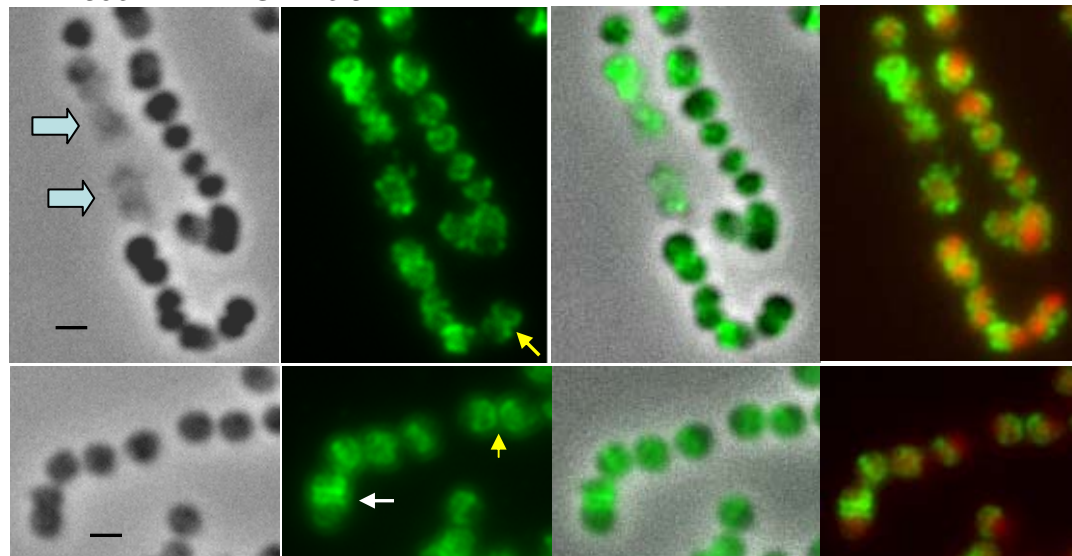

C. *secA-L-FLAG<sup>3</sup> Δcls CEP::P<sub>fcsK</sub>-cls<sup>+</sup>*

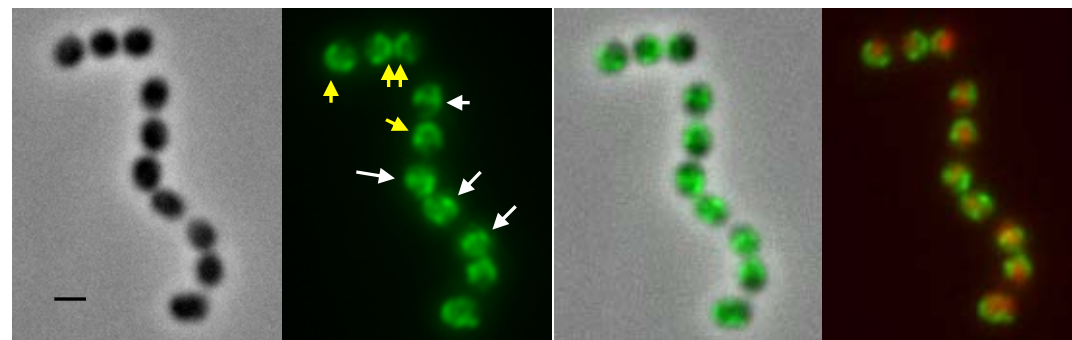

Supplement: mbo005111174sf04.pdf [file mbo005111174sf04.pdf]

# SrtA-L-FLAG<sup>3</sup>

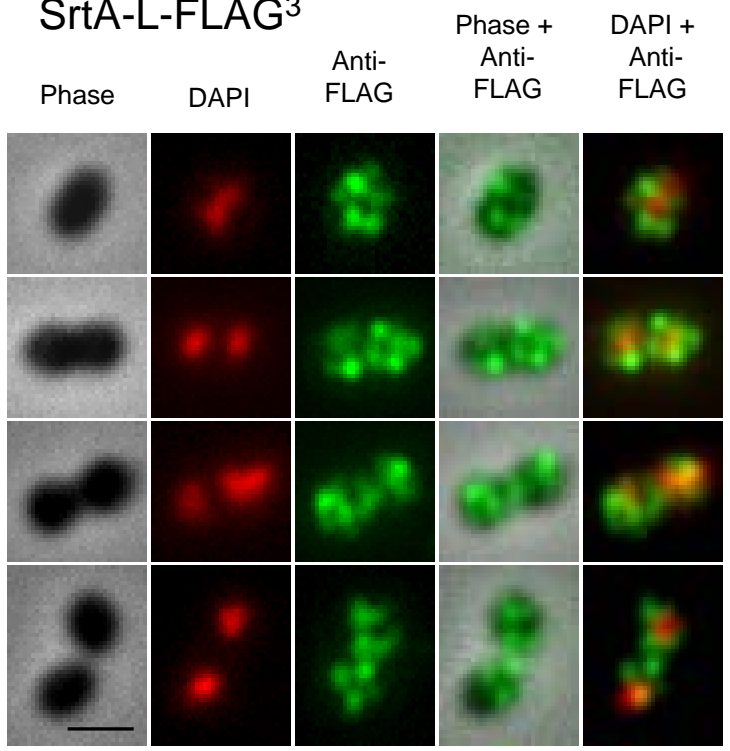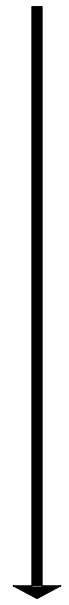

Progression of cell division

Supplement: mbo005111174sf05.pdf [file mbo005111174sf05.pdf]

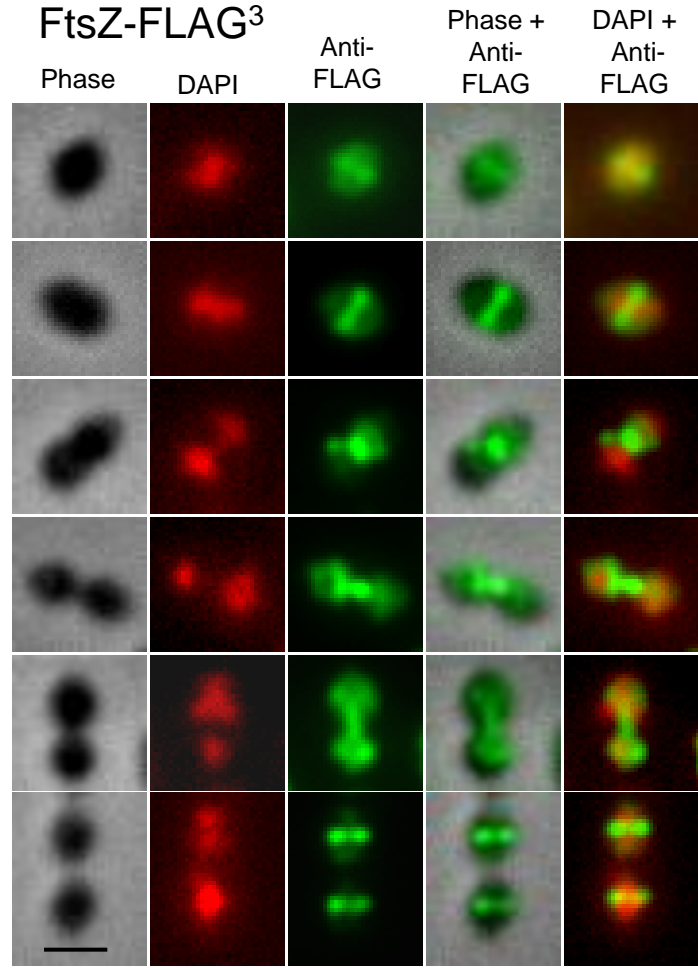

Supplement: mbo005111174sf06.pdf [file mbo005111174sf06.pdf]
